# Supplementary material
Source: PubMed Central journal article supplement (PMC4036751)
Supplement: ci5000517_si_001.pdf [file ci5000517_si_001.pdf]

# **Can Molecular Dynamics and QM/MM NBO solve the Penicillin Binding Protein Protonation Puzzle?**

Jacqueline C. Hargis, Justin K. White, Yu Chen<sup>‡</sup> & H. Lee Woodcock\*

*Department of Chemistry, University of South Florida, Tampa, Florida 33620, United States*

*<sup>‡</sup>Department of Molecular Medicine, College of Molecular Medicine, University of South Florida, Tampa, Florida, 33612, United States \*HLW email: hlw@usf.edu*

## Supporting Information

### NBO setup

Two NBO calculations were performed for each protonation state. For the remainder of the NBO methods, we will refer to them as NBO-1-X and NBO-2-X where X is the protonation state. NBO-1 is uniform for all link atoms and residues for all protonation states, however the inclusion of water molecules differs for each protonation state. This is also true for the NBO-2 calculations. All link atom cuts were chosen between carbon-carbon bonds to strategically include all atoms interacting with benzylpenicillin.

**Table S1.** DD-Peptidase NBO-1 QM region: This table includes the waters for each protonation state included in the QM region.

| Protonation State | Xtal waters            | Solvated Waters        |
|-------------------|------------------------|------------------------|
| I                 | 451, 16, 160, 202, 291 | 6417, 6404, 6441, 8586 |
| II                | 27, 16, 291            | 5837, 6386, 8038       |
| III               | 16, 27, 110, 373       | 6990                   |
| IV                | 27, 16                 | 8522                   |
| V                 | 451, 16, 27            | n/a                    |
| VI                | 451, 16, 27, 110       | 6401                   |

**Table S2:** DD-Peptidase NBO-2 QM region: This table shows all atoms included in the QM region by type for each residue. Additionally, information about the link atoms and cuts are included. Not applicable was denoted by n/a.

| Residue          | QM Atoms                                                                    | Link atom in QM | Link atom excluded |
|------------------|-----------------------------------------------------------------------------|-----------------|--------------------|
| Benzylpenicillin | All                                                                         | n/a             | n/a                |
| Ser62            | N HN CA HA CB HB1 HB2 OG<br>HG1                                             | CA              | C                  |
| Gly61            | C O                                                                         | C               | CA                 |
| His298           | N HN CA HA CB HB1 HB2 CD2<br>HD2 CG NE2 HE2 ND1 HD1 CE1<br>HE1              | CA              | C                  |
| Gly297           | C O                                                                         | C               | CA                 |
| Tyr159           | CB HB1 HB2 CG CD1 HD1 CE1<br>HE1 CZ OH HH CD2 HD2 CED2<br>HE2               | CB              | CA                 |
| Lys65            | N HN CA HA CB HB1 HB2 CG<br>HG1 HG2 CD HD1 HD2 CE HE1<br>HE2 NZ HZ1 HZ2 HZ3 | CA              | C                  |
| Thr64            | C O                                                                         | C               | CA                 |
| Arg285           | N HN CA HA CB HB1 HB2 CG<br>HG1 HG2 CD HD1 HD2 NE HE                        | CA              | C                  |

CZ NH1 HH11 HH12 NH2 HH21  
HH22

|        |     |   |    |
|--------|-----|---|----|
| Leu284 | C O | C | CA |
|--------|-----|---|----|

**Table S3:** DD-Peptidase NBO-3 QM region: This table includes the waters for each protonation state included in the QM region.

| Protonation State | Xtal waters | Solvated Waters              |
|-------------------|-------------|------------------------------|
| I                 | n/a         | n/a                          |
| II                | n/a         | n/a                          |
| III               | 373         | n/a                          |
| IV                | n/a         | n/a                          |
| V                 | 372         | 8725                         |
| VI                | 103         | 8502, 9312, 6401, 6421, 6990 |

**Table S4:** DD-Peptidase NBO-4 QM region: The following table shows all atoms included in the QM region by type for each residue. Additionally, information about the link atoms and cuts are included.

| Residue          | QM Atoms                                                 | Link atom in QM  | Link atom excluded |
|------------------|----------------------------------------------------------|------------------|--------------------|
| Benzylpenicillin | All                                                      | n/a              | n/a                |
| His298           | C O                                                      | C                | CA                 |
| Thr299           | N HN CA HA CB HB OG1 HG1<br>CG2 HG21 HG22 HG23 C O (all) | n/a              | n/a                |
| Gly300           | N HN CA HA1 HA2 C O (all)                                | n/a              | n/a                |
| Thr301           | N HN CA HA CB HB OG1 HG1<br>CG2 HG21 HG22 HG23 C O (all) | n/a              | n/a                |
| Val302           | N HN CA HA                                               | CA<br>(two cuts) | C, CB              |

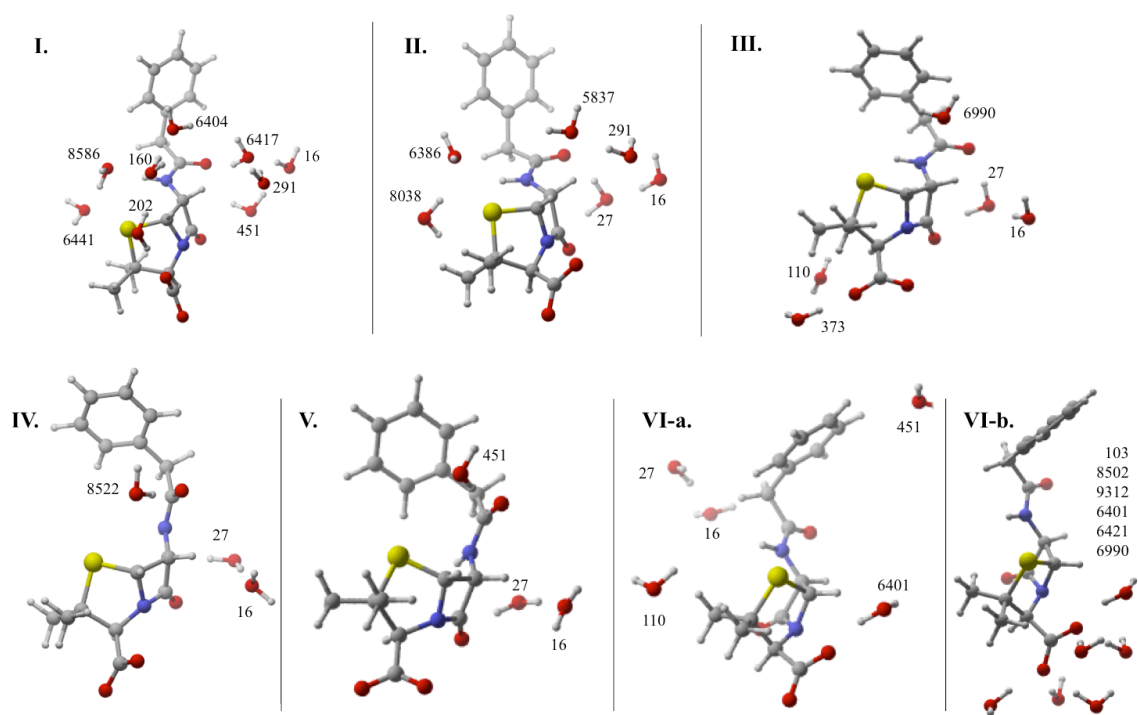

**Figure S1:** The figure shows the placement of waters in the NBO calculations.

## Beta-Lactamase NBO Setup

The beta-lactamase calculations were broken up into four NBO calculations.

The first table includes the waters for each protonation state included in the QM region. The following tables show all atoms included in the QM region by type for each residue. Additionally, information about the link atoms and cuts are included. Not applicable was denoted by n/a.

**Table S5.** Beta-lactamase-NBO-1 QM region: This calculation included the CFXA ligand and the waters.

| Protonation State | Xtal waters      | Solvated Waters                                                                                               |
|-------------------|------------------|---------------------------------------------------------------------------------------------------------------|
| A                 | 146              | 1066, 7812, 570, 6635, 3588                                                                                   |
| B                 | 274, 37, 53, 133 | 7874, 893, 964, 2416, 3413, 1736, 1399, 1726, 3526, 363, 6136, 1112, 5399, 1384, 3355, 1944, 3266, 6421, 3527 |

**Table S6.** Beta-lactamase-NBO-2 QM region: CFXA & Residues 70, 216, 233-236

| Residue | QM Atoms                                                                              | Link atom in QM | Link atom excluded |
|---------|---------------------------------------------------------------------------------------|-----------------|--------------------|
| CFXA    | All                                                                                   | n/a             | n/a                |
| Ser70   | CB HB1 BH2 OG                                                                         | CB              | CA                 |
| Thr216  | CB HB OG1 HG1 CG2 HG21<br>HG22 HG23                                                   | CB              | CA                 |
| Asp233  | C O                                                                                   | C               | CA                 |
| Lys234  | N HN CA HA CB HB1 HB2 CG<br>HG1 HG2 CD HD1 HD2 CE HE1<br>HE2 NZ HZ1 HZ2 HZ3 C O (all) | n/a             | n/a                |
| Thr235  | N HN CA HA CB HB OG1 HG1<br>CG2 HG21 HG22 HG23 C O (all)                              | n/a             | n/a                |
| Gly236  | N HN CA HA1 HA2                                                                       | CA              | C                  |

**Table S7.** Beta-lactamase-NBO-3 QM region: CFXA & Residues 104, 105, 130, 132

| Residue | QM Atoms                                                     | Link atom in QM | Link atom excluded |
|---------|--------------------------------------------------------------|-----------------|--------------------|
| CFXA    | All                                                          | n/a             | n/a                |
| Asn104  | H HN CA HA CB HB1 HB2 CG<br>OD1 ND2 HD21 HD22                | CA              | C                  |
| Tyr105  | CB HB1 HB2 CG CD1 HD1 CE1<br>HE1 CZ OH HH CD2 HD2 CE2<br>HE2 | CB              | CA                 |
| Ser130  | N HN CA HA CB HB1 HB2 OG<br>HG1                              | CA              | C                  |
| Asn132  | H HN CA HA CB HB1 HB2 CG<br>OD1 ND2 HD21 HD22                | CA              | C                  |

**Table S8.** Beta-lactamase-NBO-4 QM region: CFXA & Residues 73, 166, 167, 170, 236, 237, 218

| Residue | QM Atoms                                                         | Link atom in QM | Link atom excluded |
|---------|------------------------------------------------------------------|-----------------|--------------------|
| CFXA    | All                                                              | n/a             | n/a                |
| Lys73   | CB HB1 HB2 CG HG1 HG2 CD<br>HD1 HD2 CE HE1 HE2 NZ HZ1<br>HZ2 HZ3 | CB              | CA                 |
| Glu166  | CB HB1 HB2 CG HG1 HG2 CD<br>OE1 OE2 HE2                          | CB              | CA                 |
| Pro167  | N CD HD1 HD2 CA HA CB HB1<br>HB2 CG HG1 HG2 C O                  | n/a             | n/a                |
| Asn170  | N HN CA HA CB HB1 HB2 CG<br>OD1 ND2 HD21 HD22                    | CA              | C                  |
| Gly236  | C O                                                              | C               | CA                 |
| Ser237  | N HN CA HA CB HB1 HB2 OG<br>HG1 C O                              | n/a             | n/a                |
| Gly238  | N HN CA HA1 HA1                                                  | CA              | C                  |
